# Supplementary material for: Identification and discrimination of Toxoplasma gondii, Sarcocystis spp., Neospora spp., and Cryptosporidium spp. by righ-resolution melting analysis
Source: PubMed Central journal article supplement (PMC5367704; doi:10.1371/journal.pone.0174168), 2017-03-27
Supplement: pone.0174168.s001.pdf [file pone.0174168.s001.pdf]

**Supporting Information File 1:** Target rDNA 18S sequences (approximately 320 bp) containing conserved regions flanking sites with genetic variability among different coccidia, used for the primers design. Underlined sequences correspond to the forward and reverse primers.

>*Toxoplasma gondii* strain RH (GenBank access number EF472967.1)

GTTGTTGCAGTTAAAAAGCTCGTAGTTGGATTTCTGCTGGAAGCAGCCAGTCCGCCCCAGGGGTGTGC  
ACTTGGTGAATTCTAGCATCCTTCTGGATTTCTCCACACTTCATTGTGTGGAGTTTTTCCAGGACTTTTA  
CTTTGAGAAAATTAGAGTGTTTCAAGCAGGCTTGTGCCTTGAATACTGCAGCATGGAATAATAAGATA  
GGATTCGGCCCTATTTTGTGGTTTCTAGGACTGAAGTAATGATTAATAGGGACGGTTGGGGGCATT  
GTATTTAACTGTCAGAGGTGAAATTCTTAGAT

>*Neospora caninum* (GenBank access number U16159.1)

GTTGTTGCAGTTAAAAAGCTCGTAGTTGGATTTCTGCTGGAAGCAGCCAGTCCGCCCTCAGGGGTGTG  
CACTTGGTGAATTCTAGCATCCTTCTGGATTTCTCCACACTTCATTGTGTGGAGTTTTTCCAGGACTTTT  
ACTTTGAGAAAATTAGAGTGTTTCAAGCAGGCTTGTGCCTTGAATACTGCAGCATGGAATAATAAGAT  
AGGATTCGGCCCTATTTTGTGGTTTCTAGGACTGAAGTAATGATTAATAGGGACGGTTGGGGGCATT  
CGTATTTAACTGTCAGAGGTGAAATTCTTAGAT

>*Hammondia hammondi* (GenBank access number AF096498.1)

GTTGTTGCAGTTAAAAAGCTCGTAGTTGGATTTCTGCTGGAAGCAGCCAGTCCGCCCTCAGGGGTGTG  
CACTTGGTGAATTCTAGCATCCTTCTGGATTTCTCCACACTTCATTGTGTGGAGTTTTTCCAGGACTTTT  
ACTTTGAGAAAATTAGAGTGTTTCAAGCAGGCTTGTGCCTTGAATACTGCAGCATGGAATAATAAGAT  
AGGATTCGGCCCTATTTTGTGGTTTCTAGGACTGAAGTAATGATTAATAGGGACGGTTGGGGGCATT  
CGTATTTAACTGTCAGAGGTGAAATTCTTAGAT

>*Cryptosporidium parvum* (GenBank access number AF093494.1)

GTTGTTGCAGTTAAAAAGCTCGTAGTTGGATTTCTGTTAATAATTTATATAAAATATTTTGATGAATATTT  
ATATAATATTAACATAATTCATATACTATATATTTTAGTATATGAAATTTTACTTTGAGAAAATTAGAGT  
GCTTAAAGCAGGCATATGCCTTGAATACTCCAGCATGGAATAATATTAAGATTTTTATCTTTCTTATTG  
GTTCTAAGATAAGAATAATGATTAATAGGGACAGTTGGGGGCATTTGTATTTAAACAGTCAGAGGTGAA  
ATTCTTAGAT

>*Cyclospora cayetanensis* (GenBank access number AF111183.1)

GTTGTTGCAGTTAAAAAGCTCGTAGTTGGATTTCTGCTGTTGTCATCCGGCCTTGCCCGTAGGGTGTGC  
GCCTGGGTTGCCCGCGGCTTTCTCCGGTAGCCTTCCGCGCTTCGCTGCGTGCGTTGGTGTCCGGAAC  
TTTTACTTTGAGAAAATAGAGTGTTTCAAGCAGGCTTGTGCCTTGAATACTGCAGCATGGAATAATA  
AGATAGGACCTTGTTCTATTTTGTGGTTTCTAGGACCGAGGTAATGATTAATAGGGACAGTTGGGG  
GCATTCGTATTTAACTGTCAGAGGTGAAATTCTTAGAT

>*Sarcocystis hominis* (GenBank access number AF176945)

GTTGTTGCAGTTAAAAAGCTCGTAGTTGGATATCTGCTGGAAGCAATCAGTCCGCCCTATTTAGGGTG  
TGCACTTGATGAATTCTGGCATCTATTATCTTAATATAATGATTATTGAATTGATTTTCAATAATCAWTA  
TTAGGAATAATACAGTTACTTTGAGAAAATTAGAGTGTTTGAAGCAGGCTTATTGCCTTGAATACTGCA

GCATGGAATAACAATATAGGATTTTCGGTCTATTATTTTGTGGTTTGTAGGACTGAAATAATGATTAAT  
AGGGACAGTTGGGGGCATTCGTATTTAACTGTCAGAGGTGAAATTCTTAGAT

>*Cystoisospora timoni* (GenBank access number AY279205.1)

GTTGTTGCAGTTAAAAAGCTCGTAGTTGGATTTCTGCTGGAAGCAGCCAGTCCGCCCTTAGGGGTGTG  
ACTTGGTGAAATCCGGCATCCTCTGGTAGCGCTTCACTTAAGTGGTGGAGTGTTCAGGAC  
TTTTACTTTGAGAAAATTAGAGTGTTCAGCAGGCTTGTGCCTGAATACTGCAGCATGGAATAATA  
AGATAGGATTTCCGCCCTATTTGTTGGTTTCTAGGACTGAAGTAATGATTAATAGGGACGGTTGGGG  
GCATTCGTATTTAACTGTCAGAGGTGAAATTCTTAGAT

>*Nephrispora eptesici* (GenBank access number EU334134.1)

GTTGTTGCAGTTAAAAAGCTCGTAGTTGGATTTCTGCTGGAAGCAGCCAGTCCGCCCTAAGGGGTGTG  
CACTTGGTGAATTCTAGCATCCTTCTGGTGGTACTCCACTTCGCTGTGTGGGGTGTTCAGGACT  
TTTACTTTGAGAAAATTAGAGTGTTCAGCAGGCTTGTGCCTGAATACTGCAGCATGGAATAATA  
GATAGGATTTCCGCCCTATTTGTTGGTTTCTAGGACTGAAGTAATGATTAATAGGGACGGTTGGGG  
CATTTCGTATTTAACTGTCAGAGGTGAAATTCTTAGAT

>*Isospora belli* (GenBank access number AF106935.1)

GTTGTTGCAGTTAAAAAGCTCGTAGTTGGATTTCTGCTGGAAGCAGCCAGTCCGCCCTTAGGGGTGTG  
ACGTGGTGAATCCGGCATCCTTCTGGAGGAGCTTCGACTTAAGTGGTGGAGTGCTTTCCAGGAC  
TTTTACTTTGAGAAAATTAGAGTGTTCAGCAGGCTTGTGCCTGAATACTGCAGCATGGAATAATA  
AGATAGGATTTCCGCCCTATTTGTTGGTTTCTAGGACTGAAGTAATGATTAATAGGGACGGTTGGGG  
GCATTCGTATTTAACTGTCAGAGGTGAAATTCTTAGAT
